# Supplementary material
Source: PubMed Central journal article supplement (PMC3190997)

## SUPPLEMENTAL FIGURE LEGEND

**Fig. S1. FKBP38 is an endogenous inhibitor of mTORC1 signaling.** (A) HEK293 cells were transfected with Myc-S6K1 (left panels) or Flag-4EBP1 (right panels) with or without HA-FKBP38, serum starved, and then stimulated with 10% serum for 30 min, followed by Western analysis of cell lysates. Note that the phosphorylation state of 4EBP1 was reflected by band-shift on Flag-4EBP1 blot in addition to phospho-specific antibody recognition. (B) Cells were transduced with lentivirus expressing FKBP38 shRNA or a hairpin of scrambled sequence as control, serum-starved, and then lysed for Western analysis.

Fig. S1. Yoon et al.

**A**

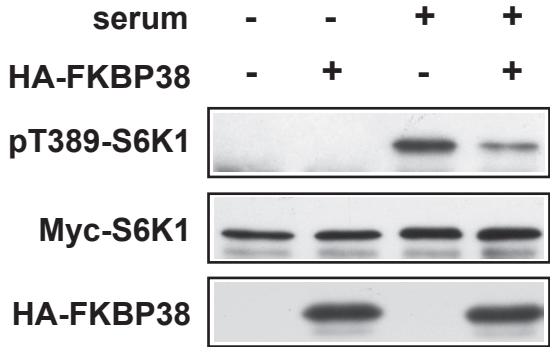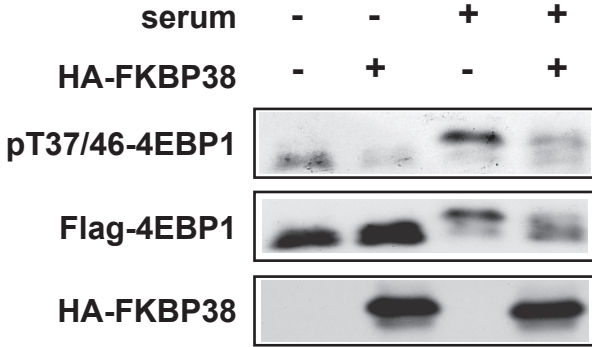

**B**

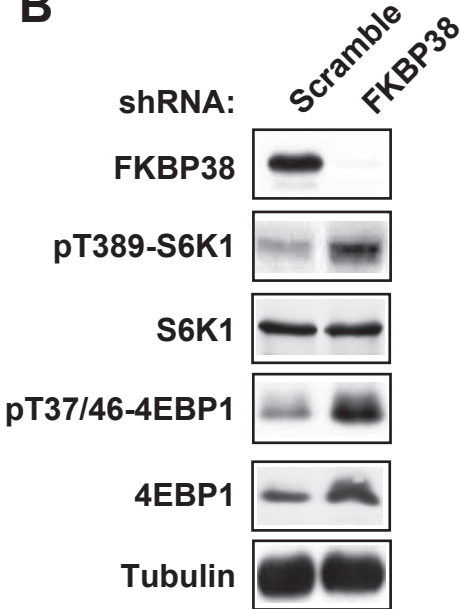

Supplement: supp_M111.262816_jbc.M111.262816-1.pdf [file supp_M111.262816_jbc.M111.262816-1.pdf]
